# Supplementary material for: Fatigue symptoms associated with COVID-19 in convalescent or recovered COVID-19 patients; a systematic review and meta-analysis
Source: bioRxiv or medRxiv preprint supplement (doi:10.1101/2021.04.23.21256006), 2021-07-16
Supplement: Supplementary file [file media-3.pdf]

### Supplementary material 3 (S-3). List of included studies

1. Carfi, A., Bernabei, R., & Landi, F. (2020). Persistent symptoms in patients after acute COVID-19. *Jama*, 324(6), 603-605.
2. Kamal, M., Abo Omirah, M., Hussein, A., & Saeed, H. (2020). Assessment and characterisation of post-COVID-19 manifestations. *International Journal of Clinical Practice*, e13746.
3. Zhao, Y. M., Shang, Y. M., Song, W. B., Li, Q. Q., Xie, H., Xu, Q. F., ... & Luo, H. (2020). Follow-up study of the pulmonary function and related physiological characteristics of COVID-19 survivors three months after recovery. *EClinicalMedicine*, 25, 100463.
4. Su, Y., Zhu, L. S., Gao, Y., Li, Y., Xiong, Z., Hu, B., ... & Cheng, F. (2020). Clinical characteristics of Covid-19 patients with re-positive test results: an observational study. *medRxiv*.
5. Wang, X., Xu, H., Jiang, H., Wang, L., Lu, C., Wei, X., ... & Xu, S. (2020). The Clinical Features and Outcomes of Discharged Coronavirus Disease 2019 Patients: A Prospective Cohort Study. *QJM: An International Journal of Medicine*.
6. Huang, C., Huang, L., Wang, Y., Li, X., Ren, L., Gu, X., ... & Cao, B. (2021). 6-month consequences of COVID-19 in patients discharged from hospital: a cohort study. *The Lancet*.
7. Liang, L., Yang, B., Jiang, N., Fu, W., He, X., Zhou, Y., ... & Wang, X. (2020). Three-Month Follow-Up Study of Survivors of Coronavirus Disease 2019 after Discharge. *Journal of Korean medical science*, 35(47).
8. Xiong, Q., Xu, M., Li, J., Liu, Y., Zhang, J., Xu, Y., & Dong, W. (2020). Clinical sequelae of COVID-19 survivors in Wuhan, China: a single-centre longitudinal study. *Clinical Microbiology and Infection*, 27(1), 89-95.
9. El Sayed, S., Shokry, D., & Gomaa, S. M. (2020). Post-COVID-19 fatigue and anhedonia: A cross-sectional study and their correlation to post-recovery period. *Neuropsychopharmacology Reports*.
10. Landi, F., Carfi, A., Benvenuto, F., Brandi, V., Ciciarello, F., Monaco, M. R. L., ... & Team, P. A. C. (2020). Predictive Factors for a New Positive Nasopharyngeal Swab Among Patients Recovered From COVID-19. *American Journal of Preventive Medicine*, 60(1), 13-19.
11. de Graaf, M. A., Antoni, M. L., ter Kuile, M. M., Arbous, M. S., Duiniveld, A. J. F., Feltkamp, M. C. W., ... & Roukens, A. H. E. (2021). Short-term outpatient follow-up of COVID-19 patients: A multidisciplinary approach. *EClinicalMedicine*, 100731.
12. Daher, A., Balfanz, P., Cornelissen, C., Müller, A., Bergs, I., Marx, N., ... & Müller, T. (2020). Follow up of patients with severe coronavirus disease 2019 (COVID-19): Pulmonary and extrapulmonary disease sequelae. *Respiratory medicine*, 174, 106197.
13. Klein, H., Asseo, K., Karni, N., Benjamini, Y., Nir-Paz, R., Muszkat, M., ... & Niv, M. Y. (2020). Onset, duration, and persistence of taste and smell changes and other COVID-19 symptoms: longitudinal study in Israeli patients. *medRxiv*.
14. Knight, D., Downes, K., Munipalli, B., Halkar, M. G., Logvinov, I. I., Speicher, L. L., & Hines, S. L. Symptoms and Clinical Outcomes of Coronavirus Disease 2019 in the Outpatient Setting. *SN Comprehensive Clinical Medicine*, 1-8.
15. Paneroni, M., Simonelli, C., Saleri, M., Bertacchini, L., Venturelli, M., Troosters, T., ... & Vitacca, M. (2021). Muscle strength and physical performance in patients without previous disabilities recovering from COVID-19 pneumonia. *American Journal of Physical Medicine & Rehabilitation*, 100(2), 105-109.

16. Venturelli, S., Benatti, S. V., Casati, M., Binda, F., Zuglian, G., Imeri, G., ... & Rizzi, M. (2021). Surviving COVID-19 in Bergamo Province: a post-acute outpatient re-evaluation. *Epidemiology & Infection*, 1-25.
17. Halpin, S. J., Mclvor, C., Whyatt, G., Adams, A., Harvey, O., McLean, L., ... & Collins, T. (2020). Postdischarge symptoms and rehabilitation needs in survivors of COVID-19 infection: A cross-sectional evaluation. *Journal of medical virology*.
18. Cellai, M., & O'Keefe, J. B. (2020, October). Characterization of prolonged COVID-19 symptoms in an outpatient telemedicine clinic. In *Open forum infectious diseases* (Vol. 7, No. 10, p. ofaa420). US: Oxford University Press.
19. Tenforde, M. W., Kim, S. S., Lindsell, C. J., Rose, E. B., Shapiro, N. I., Files, D. C., ... & Gong, M. N. (2020). Symptom duration and risk factors for delayed return to usual health among outpatients with COVID-19 in a multistate health care systems network—United States, March–June 2020. *Morbidity and Mortality Weekly Report*, 69(30), 993.
20. Townsend, L., Dyer, A. H., Jones, K., Dunne, J., Mooney, A., Gaffney, F., ... & Sugrue, J. A. (2020). Persistent fatigue following SARS-CoV-2 infection is common and independent of severity of initial infection. *PloS one*, 15(11), e0240784.
21. D'Cruz, R. F., Waller, M. D., Perrin, F., Periselneris, J., Norton, S., Smith, L. J., ... & Madula, R. (2020). Chest radiography is a poor predictor of respiratory symptoms and functional impairment in survivors of severe COVID-19 pneumonia. *ERJ Open Research*.
22. Mandal, S., Barnett, J., Brill, S. E., Brown, J. S., Denny, E. K., Hare, S. S., ... & Hurst, J. R. (2020). 'Long-COVID': a cross-sectional study of persisting symptoms, biomarker and imaging abnormalities following hospitalisation for COVID-19. *Thorax*.
23. Latronico, N., Peli, E., Rodella, F., Novelli, M. P., Rasulo, F. A., Piva, S., & Center, L. O. T. O. (2020). Six-Month Outcome in Survivors of COVID-19 Associated Acute Respiratory Distress Syndrome. *Six-Month Outcome in Survivors of COVID-19 Associated Acute Respiratory Distress Syndrome*.
24. Leth, S., Gunst, J. D., Mathiasen, V. D., Hansen, K. S., Sogaard, O. S., Østergaard, L., ... & Agergaard, J. (2021, January). Persistent symptoms in hospitalized patients recovering from COVID-19 in Denmark. In *Open Forum Infectious Diseases*.
25. Bliddal, S., Banasik, K., Pedersen, O. B., Nissen, I., Cantwell, L., Schwinn, M., ... & Feldt-Rasmussen, U. (2021). Acute and persistent symptoms in non-hospitalized PCR-confirmed COVID-19 patients. *medRxiv*.
26. Petersen, M. S., Kristiansen, M. F., Hanusson, K. D., Danielsen, M. E., Gaini, S., Strøm, M., & Weihe, P. (2020). Long COVID in the Faroe Islands—a longitudinal study among non-hospitalized patients. *Clinical Infectious Diseases*.
27. Cirulli, E., Barrett, K. M. S., Riffle, S., Bolze, A., Neveux, I., Dabe, S., ... & Washington, N. L. (2020). Long-term COVID-19 symptoms in a large unselected population. *medrxiv*.
28. Jacobs, L. G., Gourni Paleoudis, E., Lesky-Di Bari, D., Nyirenda, T., Friedman, T., Gupta, A., ... & Aschner, J. L. (2020). Persistence of symptoms and quality of life at 35 days after hospitalization for COVID-19 infection. *PloS one*, 15(12), e0243882.
29. Clavario, P., De Marzo, V., Lotti, R., Barbara, C., Porcile, A., Russo, C., ... & Porto, I. (2020). Assessment of functional capacity with cardiopulmonary exercise testing in non-severe COVID-19 patients at three months follow-up. *medRxiv*.

30. Contreras-Andrade, R. I., Juárez-González, L. I., Arellano-Montellano, E. I., & Herrera-García, J. C. (2020). Persistencia de síntomas en pacientes después de la enfermedad por coronavirus (COVID-19) en un hospital de tercer nivel de Puebla, México. *Medicina Interna de México*, 36(6), 789-793.
31. Moradian, S. T., Parandeh, A., Khalili, R., & Karimi, L. (2020). Delayed Symptoms in Patients Recovered from COVID-19. Available at SSRN 3667840.
32. Savarraj, J. P., Burkett, A. B., Hinds, S. N., Paz, A. S., Assing, A. R., Juneja, S., ... & Choi, H. A. (2020). Three-month outcomes in hospitalized COVID-19 patients. medRxiv.
33. Sudre, C. H., Murray, B., Varsavsky, T., Graham, M. S., Penfold, R. S., Bowyer, R. C., ... & Steves, C. J. (2020). Attributes and predictors of Long-COVID: analysis of COVID cases and their symptoms collected by the Covid Symptoms Study App. medRxiv.
34. Townsend, L., Dowds, J., O'Brien, K., Sheill, G., Dyer, A. H., O'Kelly, B., ... & Bannan, C. Persistent Poor Health Post-COVID-19 Is Not Associated with Respiratory Complications or Initial Disease Severity. *Annals of the American Thoracic Society*, (ja).
35. Woo, M. S., Malsy, J., Pöttgen, J., Seddiq Zai, S., Ufer, F., Hadjilaou, A., ... & Friese, M. A. (2020). Frequent neurocognitive deficits after recovery from mild COVID-19. *Brain communications*, 2(2), fcaa205.
36. Chun, H. J., Coutavas, E., Pine, A., Lee, A. I., Yu, V., Shallow, M., ... & Kraft, B. D. (2021). Immuno-fibrotic drivers of impaired lung function in post-COVID-19 syndrome. medRxiv.
37. Horvath, L., Lim, J. W. J., Taylor, J. W., Saief, T., Stuart, R., Rimmer, J., & Michael, P. (2020). Smell and taste loss in COVID-19 patients: assessment outcomes in a Victorian population. *Acta Oto-Laryngologica*, 1-5.
38. Miyazato, Y., Morioka, S., Tsuzuki, S., Akashi, M., Osanai, Y., Tanaka, K., ... & Ohmagari, N. (2020, November). Prolonged and late-onset symptoms of coronavirus disease 2019. In *Open forum infectious diseases* (Vol. 7, No. 11, p. ofaa507). US: Oxford University Press.
39. Sykes, D. L., Holdsworth, L., Jawad, N., Gunasekera, P., Morice, A. H., & Crooks, M. G. (2021). Post-COVID-19 Symptom Burden: What is Long-COVID and How Should We Manage It?. *Lung*, 1-7.
40. Goërtz YMJ, Van Herck M, Delbressine JM, et al. Persistent symptoms 3 months after a SARS-CoV-2 infection: the post-COVID-19 syndrome? *ERJ Open Research* 2020;6(4):00542-2020 doi: 10.1183/23120541.00542-2020[published Online First: Epub Date]
41. Garrigues, E., Janvier, P., Kherabi, Y., Le Bot, A., Hamon, A., Gouze, H., ... & Nguyen, Y. (2020). Post-discharge persistent symptoms and health-related quality of life after hospitalization for COVID-19. *Journal of Infection*, 81(6), e4-e6.
