# Supplementary material for: Fatigue symptoms associated with COVID-19 in convalescent or recovered COVID-19 patients; a systematic review and meta-analysis
Source: bioRxiv or medRxiv preprint supplement (doi:10.1101/2021.04.23.21256006), 2021-07-16
Supplement: Supplementary file [file media-4.pdf]

Supplementary material 4 (S-4). Additional analyses

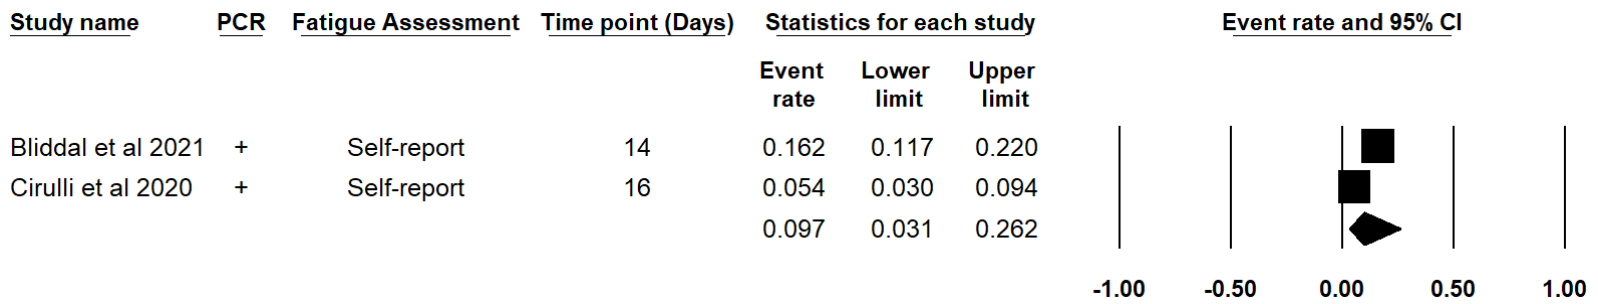

Figure S-4a. Prevalence of self-reported fatigue during the first month of COVID-19 recovery within samples recruited through patient registries or epidemiological datasets.

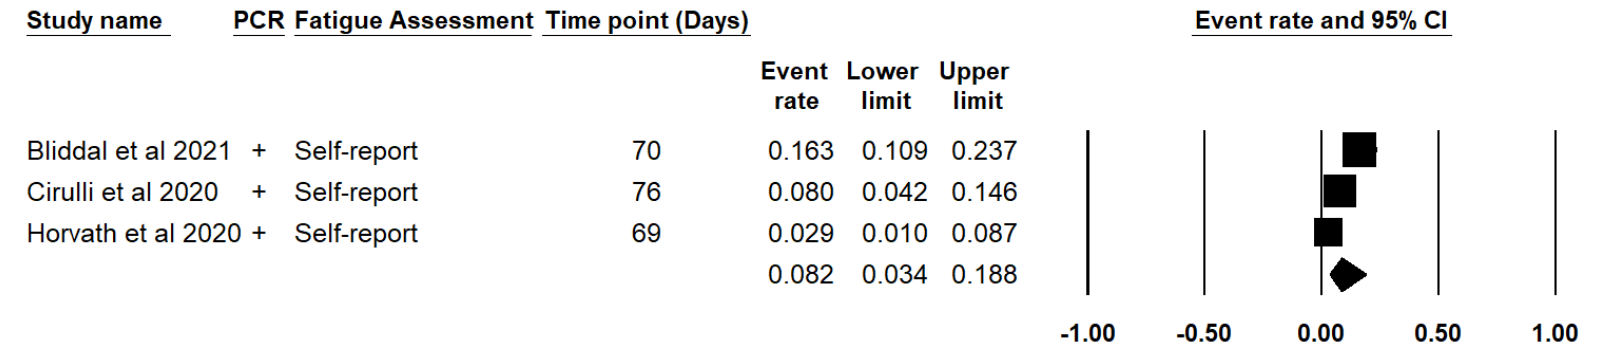

Figure S-4b. Prevalence of self-reported fatigue during the third month of COVID-19 recovery within samples recruited through patient registries or epidemiological datasets.

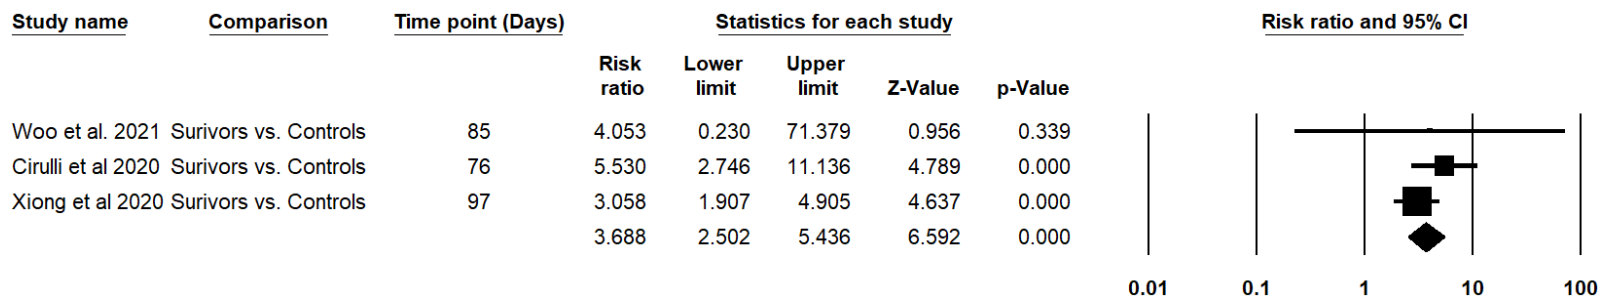

Figure S-4c. Fatigue incidence comparison between COVID-19 recovery and Healthy Controls during follow-up conducted 76 to 97 days post-recovery.

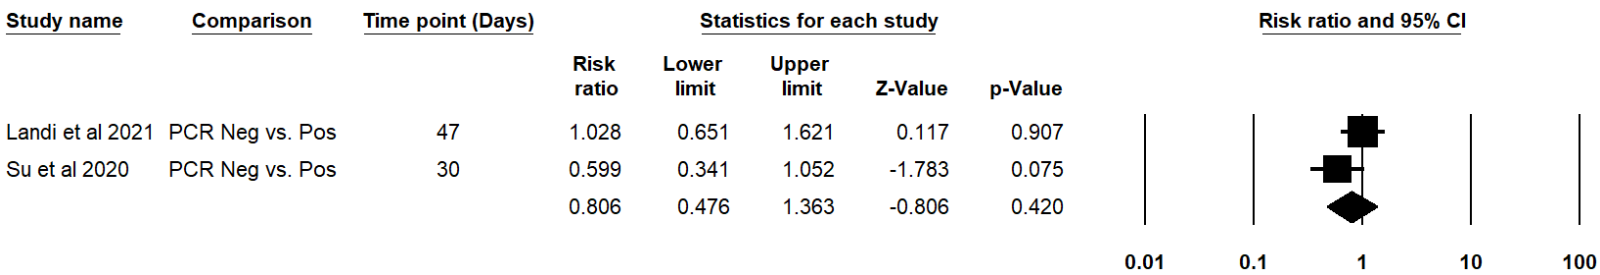

Figure S-4d. Fatigue incidence comparison between patients with negative PCR results and patients re-tested positive for COVID-19

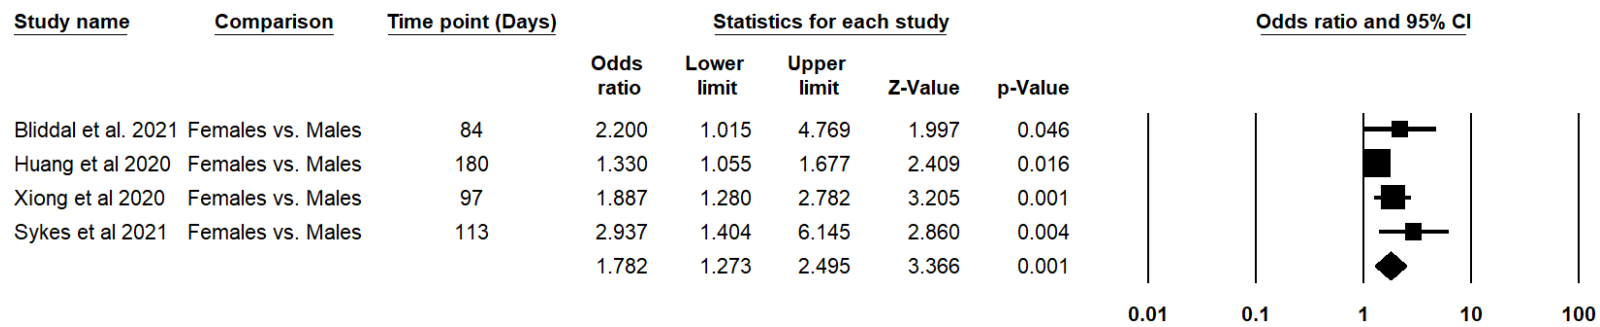

Figure S-4e. Self-reported Fatigue incidence comparison between Female and Male that recovered from COVID-19.

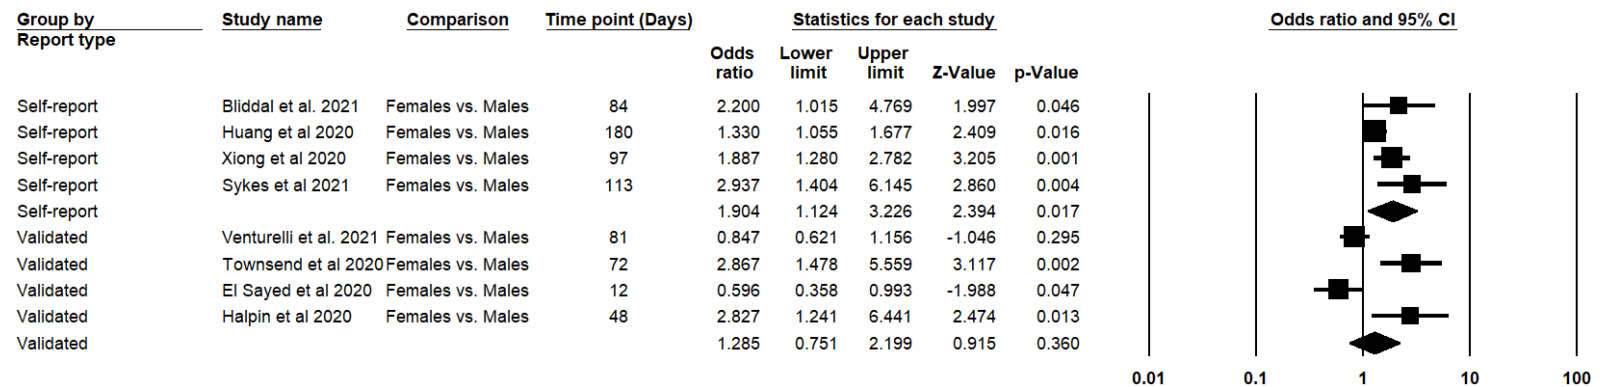

Figure S-4f. Gender differences in fatigue grouped by fatigue report type.

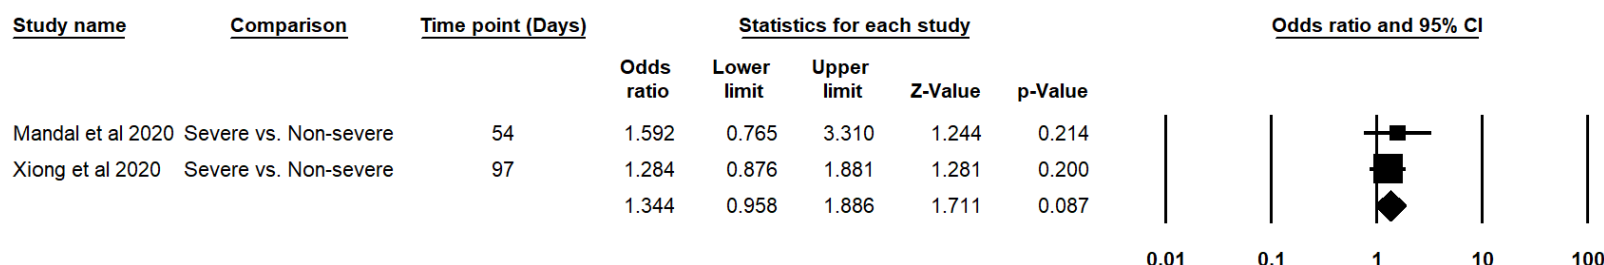

Figure S-4g. Self-reported Fatigue incidence comparison between recovery from severe and non-severe COVID-19.

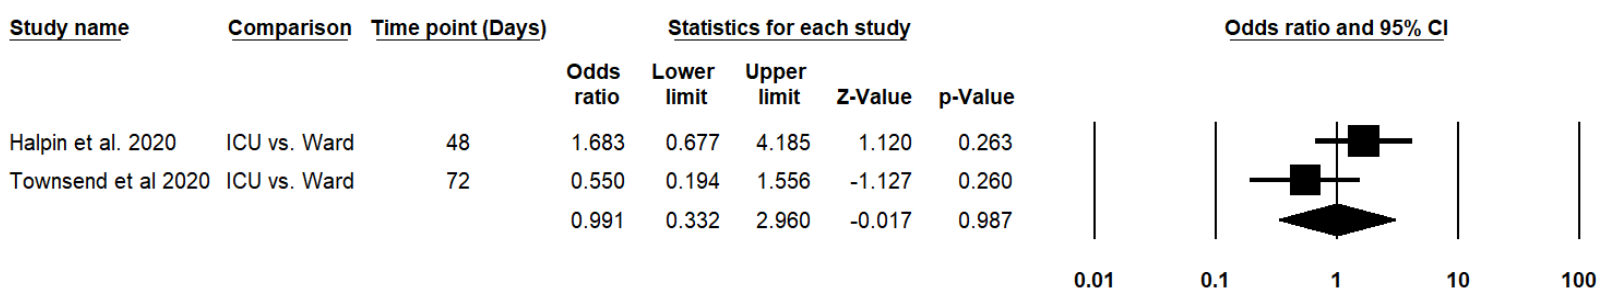

Figure S-4h. Fatigue incidence measured by validated scale between patients discharged from ICU and hospital Wards.

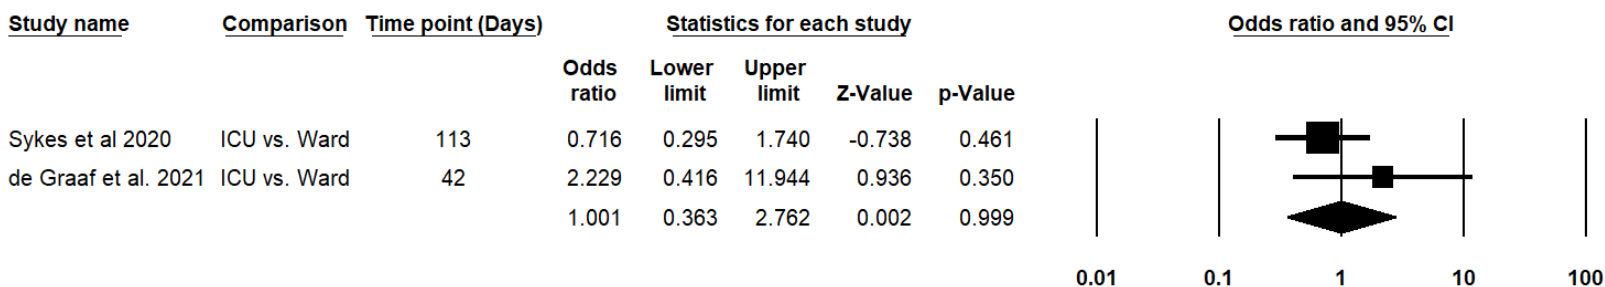

Figure S-4i. Self-reported Fatigue incidence comparison between patients discharged from ICU and hospital Wards.
