# Supplementary material for: Fatigue symptoms associated with COVID-19 in convalescent or recovered COVID-19 patients; a systematic review and meta-analysis
Source: bioRxiv or medRxiv preprint supplement (doi:10.1101/2021.04.23.21256006), 2021-07-16
Supplement: Supplementary file [file media-5.pdf]

Supplementary material 5 (S-5). Publication bias

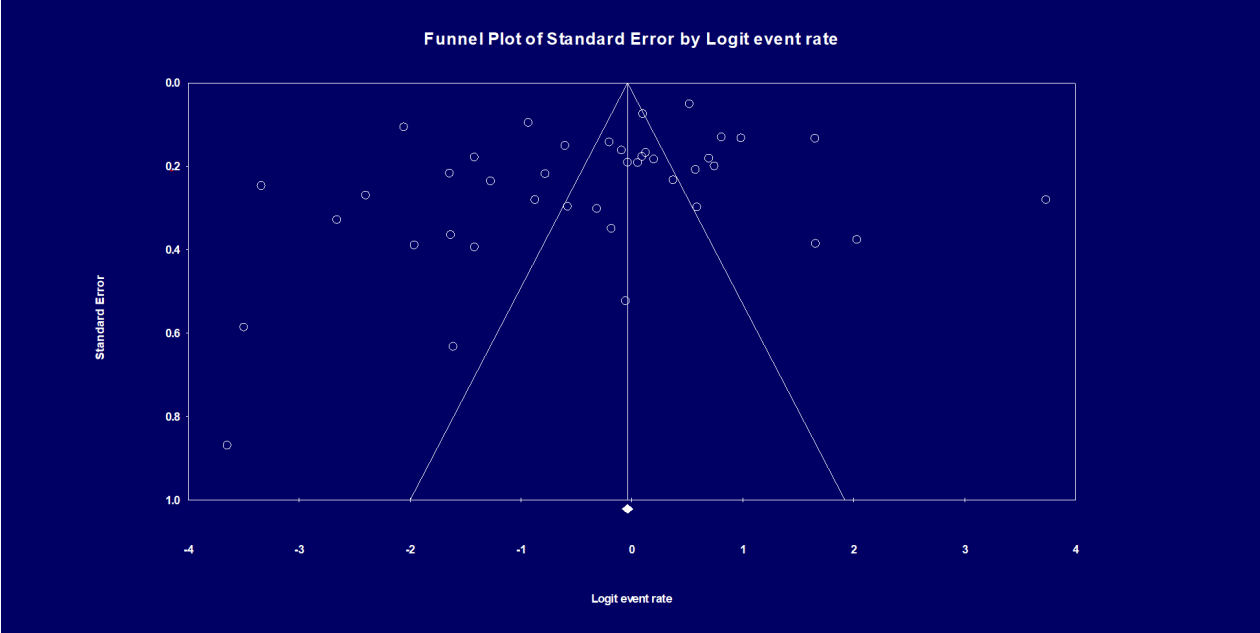

Figure S-2a. Funnel plot of studies associated with all included studies.

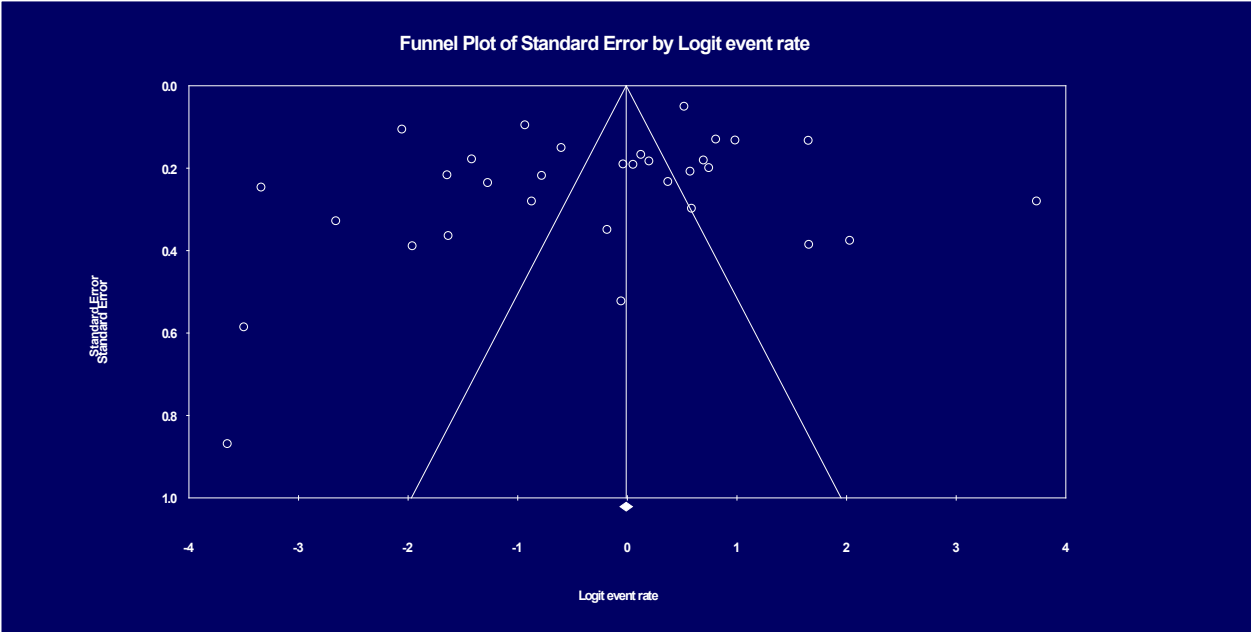

Figure S-2b. Funnel plot of studies in which fatigue was assessed through self-report.

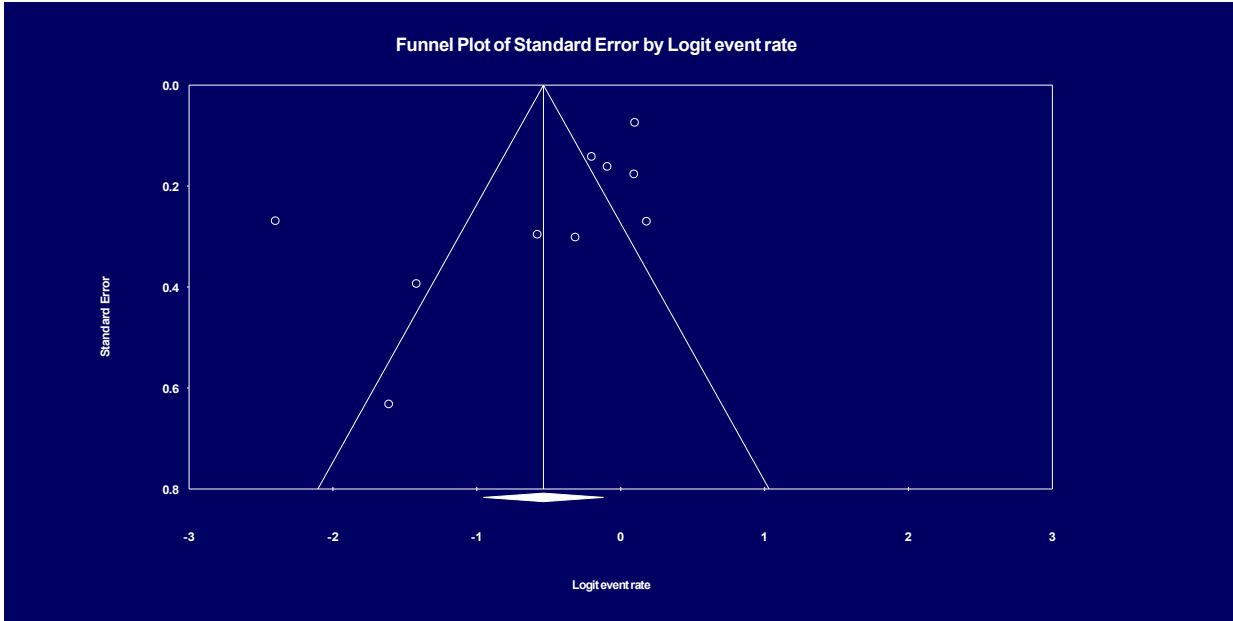

Figure S-2c. Funnel plot of studies in which fatigue was assessed through validated measures.
